# Supplementary material for: A mathematical model of CO2, O2 and N2 exchange during venovenous extracorporeal membrane oxygenation
Source: Intensive Care Med Exp. 2018 Aug 9;6:25. doi: 10.1186/s40635-018-0183-4 (PMC6085277; doi:10.1186/s40635-018-0183-4)
Supplement: Supplementary file 3 — This file contains the output of the program for the validation against Zanella’s model. Each worksheet contains the output of the program and graphs generated from this output, corresponding to one of Zanella’s figures. (XLSX 155 kb) [file 40635_2018_183_MOESM3_ESM.xlsx]

## Sheet: Read me
	This file contains the output from the ECMO model program when it was run with the same input data that Zanella’s model used.
	Each sheet is related to one figure in Zanella's paper, and contains the output from the ECMO model program when the input data for that figure in Zanella’s paper is used.
	It also contains a graph generated from that output, with the intention of replicating that particular figure.

## Sheet: Fig 3
Input parameters													Output parameters
Qpa	SF_lung	lung_VQratio	FIO2	Q_ec	SF_ec	oxy_VQratio	FoxyO2	RCF_ec	haemoglobin	temp	DP50	hct	PAO2	PACO2	PAN2	CAO2	CACO2	SAO2	PaO2	PaCO2	PaN2	CaO2	CaCO2	SaO2	PvO2	PvCO2	PvN2	CvO2	CvCO2	SvO2	PpreO2	PpreCO2	PpreN2	CpreO2	CpreCO2	SpreO2	PpostO2	PpostCO2	PpostN2	CpostO2	CpostCO2	SpostO2	PpaO2	PpaCO2	PpaN2	CpaO2	CpaCO2	SpaO2
7	0.9	1	1	1	0	7.16	1	0.1	11	37	0	0.33	673.6	39.4	0	17.3	50.12	99.9	17.4	40	0	4.35	54.23	28.1	6.5	43	0	0.78	57.08	5	12.7	40.6	0	2.44	55.22	15.7	692.8	20.2	0	17.36	38.42	100	13.8	39.9	0	2.91	54.68	18.8
7	0.9	1	1	1.5	0	3.57	1	0.1	11	37	0	0.33	675.6	37.4	0	17.31	49.09	99.9	26.8	40	0	7.85	53	50.8	17.6	43	0	4.27	55.85	27.6	20.7	41.5	0	5.58	54.6	36.1	685.7	27.3	0	17.34	43.29	100	23.8	40.1	0	6.79	53.43	44
7	0.9	1	1	2	0	2.37	1	0.1	11	37	0	0.33	676.8	36.2	0	17.31	48.43	99.9	34.3	40	0	10.12	52.21	65.5	23.6	43.1	0	6.55	55.07	42.4	26.5	42	0	7.63	54.12	49.4	681.9	31.1	0	17.33	45.59	100	31.5	40.3	0	9.32	52.63	60.3
7	0.9	1	1	2.5	0	1.77	1	0.1	11	37	0	0.33	677.6	35.4	0	17.32	47.97	100	40.9	40	0	11.72	51.66	75.8	28.3	43.1	0	8.15	54.52	52.7	31.1	42.3	0	9.06	53.76	58.7	679.6	33.4	0	17.32	46.9	100	38.2	40.4	0	11.1	52.07	71.8
7	0.9	1	1	3	0	1.41	1	0.1	11	37	0	0.33	678.3	34.7	0	17.32	47.63	100	47.8	40	0	12.9	51.26	83.4	32.2	43.2	0	9.33	54.11	60.4	34.9	42.5	0	10.13	53.48	65.6	678.1	34.9	0	17.32	47.75	100	44.8	40.5	0	12.41	51.66	80.3
7	0.9	1	1	3.5	0	1.18	1	0.1	11	37	0	0.33	678.7	34.3	0	17.32	47.38	100	56	40	0	13.81	50.96	89.2	35.6	43.2	0	10.24	53.82	66.3	38.2	42.6	0	10.95	53.27	70.9	676.9	36.1	0	17.31	48.35	99.9	52.2	40.5	0	13.42	51.36	86.8
7	0.9	1	1	4	0	1.01	1	0.1	11	37	0	0.33	679.1	33.9	0	17.32	47.19	100	68.3	40	0	14.54	50.72	93.7	38.5	43.3	0	10.97	53.58	71	41.2	42.8	0	11.6	53.1	75.1	676.1	36.9	0	17.31	48.79	99.9	62.1	40.6	0	14.23	51.12	91.8
7	0.9	1	1	4.5	0	0.88	1	0.1	11	37	0	0.33	679.3	33.7	0	17.32	47.04	100	93.7	40	0	15.13	50.55	97.1	41.2	43.4	0	11.56	53.41	74.8	44	42.9	0	12.13	52.99	78.5	675.4	37.6	0	17.31	49.15	99.9	80.1	40.6	0	14.88	50.94	95.8
7	0.9	1	1	5	0	0.78	1	0.1	11	37	0	0.33	679.5	33.5	0	17.32	46.96	100	158.7	40	0	15.62	50.46	99	43.7	43.5	0	12.05	53.31	77.9	46.6	43.1	0	12.57	52.93	81.3	674.8	38.2	0	17.31	49.47	99.9	125.8	40.7	0	15.43	50.84	98.4
7	0.7	1	1	0.5	0	16.47	1	0.1	11	37	0	0.33	675.7	37.3	0	17.31	49.03	99.9	35.8	40	0	10.54	52.06	68.2	24.8	43.1	0	6.97	54.92	45.1	27.1	39.2	0	8.01	52.49	51.9	701.6	11.4	0	17.39	30.67	100	26.3	40.6	0	7.64	53.36	49.4
7	0.7	1	1	1	0	3.73	1	0.1	11	37	0	0.33	676.3	36.7	0	17.31	48.68	99.9	41	40	0	11.73	51.65	75.9	28.4	43.1	0	8.16	54.51	52.8	31	41.4	0	9.08	53.28	58.8	687.3	25.7	0	17.35	42.2	100	31.7	40.9	0	9.34	52.93	60.5
7	0.7	1	1	1.5	0	2.04	1	0.1	11	37	0	0.33	676.8	36.2	0	17.31	48.4	99.9	46.3	40	0	12.68	51.34	82	31.5	43.2	0	9.11	54.19	58.9	34.1	42.1	0	9.93	53.36	64.3	681.3	31.7	0	17.33	45.89	100	36.8	41.1	0	10.69	52.59	69.2
7	0.7	1	1	2	0	1.4	1	0.1	11	37	0	0.33	677.3	35.7	0	17.31	48.18	100	52.2	40	0	13.45	51.08	86.9	34.2	43.2	0	9.87	53.93	63.9	36.8	42.5	0	10.62	53.31	68.7	678.2	34.8	0	17.32	47.65	100	41.7	41.3	0	11.79	52.32	76.3
7	0.7	1	1	2.5	0	1.07	1	0.1	11	37	0	0.33	677.6	35.4	0	17.32	48	100	59.5	40	0	14.08	50.87	90.9	36.6	43.2	0	10.51	53.73	68	39.3	42.7	0	11.19	53.22	72.4	676.4	36.6	0	17.31	48.67	99.9	46.9	41.5	0	12.7	52.1	82.1
7	0.7	1	1	3	0	0.87	1	0.1	11	37	0	0.33	677.9	35.1	0	17.32	47.85	100	70.4	40	0	14.62	50.7	94.2	38.8	43.3	0	11.05	53.56	71.5	41.6	42.9	0	11.67	53.13	75.5	675.1	37.9	0	17.31	49.32	99.9	52.9	41.7	0	13.46	51.92	87
7	0.7	1	1	3.5	0	0.73	1	0.1	11	37	0	0.33	678.1	34.9	0	17.32	47.73	100	89.9	40	0	15.07	50.57	96.8	40.9	43.3	0	11.5	53.42	74.4	43.8	43	0	12.08	53.06	78.2	674.2	38.8	0	17.3	49.77	99.9	60.8	41.8	0	14.11	51.78	91.1
7	0.7	1	1	4	0	0.63	1	0.1	11	37	0	0.33	678.2	34.8	0	17.32	47.66	100	131.7	40	0	15.47	50.48	98.6	42.9	43.4	0	11.9	53.34	77	45.8	43.2	0	12.44	53.01	80.5	673.6	39.4	0	17.3	50.13	99.9	73.1	42	0	14.68	51.69	94.6
7	0.7	1	1	4.5	0	0.55	1	0.1	11	37	0	0.33	678.3	34.7	0	17.32	47.62	100	204.6	40	0	15.81	50.44	99.4	44.8	43.6	0	12.24	53.29	79.2	47.9	43.4	0	12.75	53.01	82.4	672.9	40.1	0	17.3	50.44	99.9	98	42.2	0	15.17	51.64	97.3
7	0.7	1	1	5	0	0.49	1	0.1	11	37	0	0.33	678.3	34.7	0	17.32	47.61	100	290.4	40	0	16.12	50.42	99.7	46.7	43.8	0	12.54	53.28	81.1	49.9	43.6	0	13.02	53.02	84.2	672.4	40.6	0	17.3	50.71	99.9	156.5	42.3	0	15.6	51.63	99
7	0.5	1	1	0.5	0	3.4	1	0.1	11	37	0	0.33	676.3	36.7	0	17.31	48.71	99.9	60.9	40	0	14.17	50.84	91.5	37	43.2	0	10.6	53.7	68.6	39.3	41.5	0	11.28	52.56	73	687.1	25.9	0	17.35	42.35	100	38.5	42.1	0	11.04	52.97	71.4
7	0.5	1	1	1	0	1.28	1	0.1	11	37	0	0.33	676.5	36.5	0	17.31	48.6	99.9	68.7	40	0	14.55	50.72	93.8	38.6	43.3	0	10.98	53.58	71.1	41.2	42.6	0	11.62	53	75.2	677.9	35.1	0	17.32	47.81	100	42.1	42.4	0	11.8	52.84	76.3
7	0.5	1	1	1.5	0	0.79	1	0.1	11	37	0	0.33	676.6	36.4	0	17.31	48.51	99.9	80.2	40	0	14.89	50.62	95.8	40.1	43.3	0	11.32	53.48	73.3	42.9	43	0	11.92	53.09	77.1	674.6	38.4	0	17.31	49.58	99.9	45.9	42.6	0	12.48	52.73	80.7
7	0.5	1	1	2	0	0.57	1	0.1	11	37	0	0.33	676.8	36.2	0	17.31	48.44	99.9	99.4	40	0	15.2	50.54	97.5	41.5	43.4	0	11.63	53.39	75.2	44.4	43.2	0	12.2	53.1	78.9	672.9	40.1	0	17.3	50.44	99.9	50.2	42.8	0	13.09	52.63	84.6
7	0.5	1	1	2.5	0	0.45	1	0.1	11	37	0	0.33	676.9	36.1	0	17.31	48.39	99.9	132.7	40	0	15.48	50.48	98.6	42.9	43.4	0	11.9	53.34	77	45.9	43.3	0	12.44	53.1	80.5	671.9	41.1	0	17.3	50.96	99.9	55.3	43.1	0	13.64	52.57	88.1
7	0.5	1	1	3	0	0.37	1	0.1	11	37	0	0.33	676.9	36.1	0	17.31	48.36	99.9	182.6	40	0	15.72	50.44	99.3	44.3	43.5	0	12.15	53.3	78.6	47.4	43.5	0	12.67	53.1	81.9	671.2	41.8	0	17.3	51.31	99.9	61.8	43.4	0	14.14	52.53	91.2
7	0.5	1	1	3.5	0	0.31	1	0.1	11	37	0	0.33	677	36	0	17.31	48.34	99.9	242.4	40	0	15.95	50.43	99.6	45.7	43.7	0	12.38	53.29	80.1	48.9	43.7	0	12.87	53.11	83.2	670.7	42.3	0	17.29	51.58	99.9	71.4	43.6	0	14.59	52.52	94
7	0.5	1	1	4	0	0.27	1	0.1	11	37	0	0.33	677	36	0	17.31	48.33	99.9	304	40	0	16.16	50.42	99.7	47	43.8	0	12.59	53.28	81.4	50.3	43.8	0	13.06	53.13	84.4	670.3	42.7	0	17.29	51.78	99.9	88	43.9	0	15.01	52.51	96.4
7	0.5	1	1	4.5	0	0.24	1	0.1	11	37	0	0.33	677	36	0	17.31	48.33	99.9	363.6	40	0	16.35	50.42	99.8	48.3	43.9	0	12.78	53.27	82.6	51.8	44	0	13.23	53.14	85.5	669.9	43.1	0	17.29	51.94	99.9	122.3	44.1	0	15.39	52.5	98.3
7	0.5	1	1	5	0	0.21	1	0.1	11	37	0	0.33	677	36	0	17.31	48.33	99.9	419.9	40	0	16.53	50.42	99.9	49.6	44.1	0	12.96	53.27	83.8	53.2	44.1	0	13.39	53.15	86.5	669.6	43.4	0	17.29	52.07	99.9	188.4	44.2	0	15.74	52.5	99.3
				Qec	Qs/Qt 0.5 SaO2	Qs/Qt 0.5 SvO2	Qs/Qt 0.7 SaO2	Qs/Qt 07 SvO2	Qs/Qt 0.9 SaO2	Qs/Qt 0.9 SvO2
				0.5	91.5	68.6	68.2	45.1
				1	93.8	71.1	75.9	52.8	28.1	5
				1.5	95.8	73.3	82	58.9	50.8	27.6
				2	97.5	75.2	86.9	63.9	65.5	42.4
				2.5	98.6	77	90.9	68	75.8	52.7
				3	99.3	78.6	94.2	71.5	83.4	60.4
				3.5	99.6	80.1	96.8	74.4	89.2	66.3
				4	99.7	81.4	98.6	77	93.7	71
				4.5	99.8	82.6	99.4	79.2	97.1	74.8
				5	99.9	83.8	99.7	81.1	99	77.9
				These two graphs do not have the "zero" value for Qec that is on Zanella's graph.
				The approach that I have used maintains alveolar V/Q constant, and maintains PaCO2
				at 40 by adjusting oxygenator ventilation. At Qec of zero, adjusting oxygenator ventilation
				has no effect on PaCO2, so this will not work. One could regard Zanella's model
				as simultaneously adjusting alveolar and oxygenator ventilation to get PaCO2 of
				40, but this is an artifical situation created by his model.
				Qec	Qs/Qt 0.5 PaO2	Qs/Qt 0.7 PaO2	Qs/Qt 0.9 PaO2
				0.5	60.9	35.8
				1	68.7	41	17.4
				1.5	80.2	46.3	26.8
				2	99.4	52.2	34.3
				2.5	132.7	59.5	40.9
				3	182.6	70.4	47.8
				3.5	242.4	89.9	56
				4	304	131.7	68.3
				4.5	363.6	204.6	93.7
				5	419.9	290.4	158.7

## Sheet: Fig 4
Input parameters														Output parameters
Qpa	VO2	SF_lung	lung_VQratio	FIO2	Q_ec	SF_ec	oxy_VQratio	FoxyO2	RCF_ec	haemoglobin	temp	DP50	hct	PAO2	PACO2	PAN2	CAO2	CACO2	SAO2	PaO2	PaCO2	PaN2	CaO2	CaCO2	SaO2	PvO2	PvCO2	PvN2	CvO2	CvCO2	SvO2	PpreO2	PpreCO2	PpreN2	CpreO2	CpreCO2	SpreO2	PpostO2	PpostCO2	PpostN2	CpostO2	CpostCO2	SpostO2	PpaO2	PpaCO2	PpaN2	CpaO2	CpaCO2	SpaO2
7	150	0.9	1	1	3.5	0	0.6	1	0.1	11	37	0	0.33	679.4	33.6	0	17.32	47.02	100	100.3	40	0	15.21	50.53	97.5	49.7	42.1	0	13.07	52.25	84.5	53.3	41.8	0	13.49	51.95	87.2	675.1	37.9	0	17.31	49.3	99.9	84.4	40.6	0	14.98	50.92	96.3
7	200	0.9	1	1	3.5	0	0.88	1	0.1	11	37	0	0.33	679.1	33.9	0	17.32	47.19	100	67.6	40	0	14.51	50.73	93.6	41.4	42.6	0	11.65	53.02	75.4	44.2	42.2	0	12.22	52.6	79.1	676.1	36.9	0	17.31	48.81	99.9	61.6	40.6	0	14.2	51.12	91.7
7	250	0.9	1	1	3.5	0	1.18	1	0.1	11	37	0	0.33	678.7	34.3	0	17.32	47.38	100	56	40	0	13.81	50.96	89.2	35.6	43.2	0	10.24	53.82	66.3	38.2	42.6	0	10.95	53.27	70.9	676.9	36.1	0	17.31	48.35	99.9	52.2	40.5	0	13.42	51.36	86.8
7	300	0.9	1	1	3.5	0	1.48	1	0.1	11	37	0	0.33	678.4	34.6	0	17.32	47.58	100	49.4	40	0	13.12	51.19	84.8	30.7	43.8	0	8.83	54.62	57.1	33.4	43.1	0	9.68	53.94	62.6	677.8	35.2	0	17.32	47.89	100	46.2	40.5	0	12.65	51.59	81.8
7	350	0.9	1	1	3.5	0	1.8	1	0.1	11	37	0	0.33	678	35	0	17.32	47.77	100	44.7	40	0	12.42	51.42	80.3	26.4	44.4	0	7.42	55.42	48	29.2	43.5	0	8.41	54.62	54.4	678.6	34.4	0	17.32	47.43	100	41.8	40.4	0	11.87	51.83	76.8
7	150	0.7	1	1	3.5	0	0.21	1	0.1	11	37	0	0.33	678.3	34.7	0	17.32	47.61	100	246.1	40	0	15.97	50.43	99.6	57.1	42.4	0	13.82	52.14	89.3	61.9	42.4	0	14.17	52.03	91.5	671.8	41.2	0	17.3	51.01	99.9	120.9	42.3	0	15.39	51.63	98.3
7	200	0.7	1	1	3.5	0	0.47	1	0.1	11	37	0	0.33	678.2	34.8	0	17.32	47.65	100	140.3	40	0	15.52	50.47	98.8	47.1	42.8	0	12.66	52.76	81.9	50.4	42.6	0	13.13	52.52	84.9	673.1	39.9	0	17.3	50.36	99.9	75.5	42	0	14.75	51.68	95
7	250	0.7	1	1	3.5	0	0.73	1	0.1	11	37	0	0.33	678.1	34.9	0	17.32	47.73	100	89.9	40	0	15.07	50.57	96.8	40.9	43.3	0	11.5	53.42	74.4	43.8	43	0	12.08	53.06	78.2	674.2	38.8	0	17.3	49.77	99.9	60.8	41.8	0	14.11	51.78	91.1
7	300	0.7	1	1	3.5	0	1.01	1	0.1	11	37	0	0.33	677.9	35.1	0	17.32	47.85	100	70.7	40	0	14.63	50.7	94.3	36.1	43.9	0	10.34	54.13	66.9	38.8	43.4	0	11.04	53.64	71.4	675.3	37.7	0	17.31	49.22	99.9	53.1	41.7	0	13.48	51.92	87.1
7	350	0.7	1	1	3.5	0	1.3	1	0.1	11	37	0	0.33	677.6	35.4	0	17.32	47.97	100	61.1	40	0	14.18	50.84	91.6	32	44.5	0	9.18	54.84	59.4	34.8	43.9	0	10	54.22	64.7	676.3	36.7	0	17.31	48.68	99.9	47.9	41.5	0	12.84	52.07	83
7	200	0.5	1	1	3.5	0	0.08	1	0.1	11	37	0	0.33	677	36	0	17.31	48.33	99.9	322.9	40	0	16.22	50.42	99.8	52.6	43.2	0	13.36	52.71	86.4	56.7	43.4	0	13.76	52.66	88.9	669.3	43.7	0	17.29	52.26	99.9	96	43.9	0	15.13	52.51	97.1
7	250	0.5	1	1	3.5	0	0.31	1	0.1	11	37	0	0.33	677	36	0	17.31	48.34	99.9	242.4	40	0	15.95	50.43	99.6	45.7	43.7	0	12.38	53.29	80.1	48.9	43.7	0	12.87	53.11	83.2	670.7	42.3	0	17.29	51.58	99.9	71.4	43.6	0	14.59	52.52	94
7	300	0.5	1	1	3.5	0	0.56	1	0.1	11	37	0	0.33	676.9	36.1	0	17.31	48.36	99.9	172.9	40	0	15.68	50.45	99.2	40.7	44.2	0	11.4	53.88	73.7	43.5	44	0	11.99	53.58	77.5	672	41	0	17.3	50.9	99.9	60.5	43.3	0	14.05	52.54	90.7
7	350	0.5	1	1	3.5	0	0.83	1	0.1	11	37	0	0.33	676.9	36.1	0	17.31	48.39	99.9	123.3	40	0	15.41	50.49	98.4	36.6	44.7	0	10.41	54.49	67.4	39.4	44.3	0	11.1	54.06	71.8	673.3	39.7	0	17.3	50.25	99.9	54	43	0	13.51	52.58	87.3
					VO2	Qs/Qt 0.5 SaO2	Qs/Qt 0.5 SvO2	Qs/Qt 0.7 SaO2	Qs/Qt 07 SvO2	Qs/Qt 0.9 SaO2	Qs/Qt 0.9 SvO2
					150			99.6	89.3	97.5	84.5
					200	99.8	86.4	98.8	81.9	93.6	75.4
					250	99.6	80.1	96.8	74.4	89.2	66.3
					300	99.2	73.7	94.3	66.9	84.8	57.1
					350	98.4	67.4	91.6	59.4	80.3	48
				These two graphs do not have the "150" value for VO2 that is on Zanella's graph
				for Qs/Qt of 0.5. The approach that I have used maintains alveolar V/Q constant, and maintains PaCO2
				at 40 by adjusting oxygenator ventilation. It was found that reducing the VO2 to 150 (and maintaining
				RQ at 0.8, hence reducing CO2 production) reduced arterial PCO2 to well below 40 in the absence
				of shunt. The rise in PaCO2 from shunt was insufficient to return it to above 40 with Qs/Qt of 0.5
				40, so even zero ventilation on the oxygenator would not achieve PaCO2 of 40.						With higher
				values of shunt, the PaCO2 rises to above 40, and it is feasible to reduce it to 40 by adjuasting
				ventilation on the oxygenator.
				One could regard Zanella's model as simultaneously adjusting alveolar and oxygenator
				ventilation to get PaCO2 of 40, but this is an artifical situation created by their model.
					Qec	Qs/Qt 0.5 PaO2	Qs/Qt 0.7 PaO2	Qs/Qt 0.9 PaO2
					150		246.1	100.3
					200	322.9	140.3	67.6
					250	242.4	89.9	56
					300	172.9	70.7	49.4
					350	123.3	61.1	44.7

## Sheet: Fig 5
Input parameters														Output parameters
Qpa	VO2	SF_lung	lung_VQratio	FIO2	Q_ec	SF_ec	oxy_VQratio	FoxyO2	RCF_ec	haemoglobin	temp	DP50	hct	PAO2	PACO2	PAN2	CAO2	CACO2	SAO2	PaO2	PaCO2	PaN2	CaO2	CaCO2	SaO2	PvO2	PvCO2	PvN2	CvO2	CvCO2	SvO2	PpreO2	PpreCO2	PpreN2	CpreO2	CpreCO2	SpreO2	PpostO2	PpostCO2	PpostN2	CpostO2	CpostCO2	SpostO2	PpaO2	PpaCO2	PpaN2	CpaO2	CpaCO2	SpaO2
7	250	0.9	1	1	3.5	0	1.17	1	0.1	5	37	0	0.15	678.5	34.5	0	8.98	51.69	100	42	40	0	5.48	55.29	77	17.4	43	0	1.91	58.14	26.7	21.3	42.4	0	2.61	57.6	36.7	676.7	36.3	0	8.98	52.68	99.9	38.3	40.5	0	5.09	55.69	71.6
7	250	0.9	1	1	3.5	0	1.17	1	0.1	6	37	0	0.18	678.5	34.5	0	10.37	50.97	100	45.1	40	0	6.87	54.57	80.7	22.2	43	0	3.3	57.43	38.7	25.8	42.4	0	4	56.88	47.1	676.8	36.2	0	10.37	51.96	99.9	41.5	40.5	0	6.48	54.97	76.2
7	250	0.9	1	1	3.5	0	1.17	1	0.1	7	37	0	0.21	678.6	34.4	0	11.76	50.26	100	47.8	40	0	8.26	53.85	83.4	26	43	0	4.68	56.7	47.3	29.2	42.5	0	5.39	56.16	54.5	676.8	36.2	0	11.76	51.24	99.9	44.2	40.5	0	7.87	54.25	79.5
7	250	0.9	1	1	3.5	0	1.17	1	0.1	8	37	0	0.24	678.6	34.4	0	13.15	49.54	100	50.1	40	0	9.65	53.13	85.4	29	43.1	0	6.07	55.98	53.8	32	42.5	0	6.78	55.44	60.1	676.8	36.2	0	13.14	50.52	99.9	46.5	40.5	0	9.26	53.52	82
7	250	0.9	1	1	3.5	0	1.17	1	0.1	9	37	0	0.27	678.6	34.4	0	14.54	48.82	100	52.2	40	0	11.03	52.4	87	31.5	43.1	0	7.46	55.26	58.9	34.4	42.6	0	8.17	54.71	64.5	676.9	36.1	0	14.53	49.8	99.9	48.6	40.5	0	10.65	52.8	83.9
7	250	0.9	1	1	3.5	0	1.18	1	0.1	10	37	0	0.3	678.7	34.3	0	15.93	48.1	100	54.2	40	0	12.42	51.68	88.2	33.7	43.2	0	8.85	54.54	63	36.4	42.6	0	9.56	53.99	68	676.9	36.1	0	15.92	49.07	99.9	50.4	40.5	0	12.03	52.08	85.5
7	250	0.9	1	1	3.5	0	1.18	1	0.1	11	37	0	0.33	678.7	34.3	0	17.32	47.38	100	56	40	0	13.81	50.96	89.2	35.6	43.2	0	10.24	53.82	66.3	38.2	42.6	0	10.95	53.27	70.9	676.9	36.1	0	17.31	48.35	99.9	52.2	40.5	0	13.42	51.36	86.8
7	250	0.9	1	1	3.5	0	1.18	1	0.1	12	37	0	0.36	678.8	34.2	0	18.71	46.66	100	57.7	40	0	15.2	50.24	90.1	37.2	43.3	0	11.63	53.09	69.1	39.8	42.7	0	12.34	52.55	73.3	677	36	0	18.7	47.62	99.9	53.8	40.5	0	14.81	50.63	87.8
7	250	0.9	1	1	3.5	0	1.18	1	0.1	13	37	0	0.39	678.8	34.2	0	20.1	45.94	100	59.3	40	0	16.59	49.51	90.8	38.7	43.3	0	13.02	52.37	71.4	41.3	42.7	0	13.73	51.82	75.3	677	36	0	20.09	46.9	99.9	55.3	40.5	0	16.2	49.91	88.8
7	250	0.9	1	1	3.5	0	1.18	1	0.1	14	37	0	0.42	678.8	34.2	0	21.49	45.23	100	60.8	40	0	17.98	48.79	91.5	40.1	43.4	0	14.41	51.65	73.4	42.7	42.8	0	15.12	51.1	77	677.1	35.9	0	21.48	46.18	99.9	56.7	40.5	0	17.59	49.18	89.5
7	250	0.9	1	1	3.5	0	1.18	1	0.1	15	37	0	0.45	678.9	34.1	0	22.88	44.51	100	62.3	40	0	19.37	48.07	92	41.4	43.4	0	15.8	50.92	75.2	43.9	42.8	0	16.51	50.38	78.5	677.1	35.9	0	22.87	45.45	100	58.1	40.6	0	18.98	48.46	90.2
7	250	0.7	1	1	3.5	0	0.73	1	0.1	5	37	0	0.15	677.9	35.1	0	8.98	52.02	100	69.3	40	0	6.74	54.86	94	24.8	43	0	3.17	57.72	44.5	28.5	42.7	0	3.75	57.35	52.7	674.2	38.8	0	8.97	54.08	99.9	46.2	41.7	0	5.78	56.08	81.1
7	250	0.7	1	1	3.5	0	0.73	1	0.1	6	37	0	0.18	678	35	0	10.37	51.3	100	73.4	40	0	8.13	54.15	94.8	28.9	43.1	0	4.56	57	53.6	32.3	42.8	0	5.14	56.64	60.4	674.2	38.8	0	10.36	53.36	99.9	49.3	41.7	0	7.17	55.37	84.2
7	250	0.7	1	1	3.5	0	0.73	1	0.1	7	37	0	0.21	678	35	0	11.76	50.59	100	77.2	40	0	9.52	53.43	95.4	32.2	43.1	0	5.95	56.29	60.1	35.4	42.8	0	6.53	55.92	66	674.2	38.8	0	11.75	52.65	99.9	52.1	41.7	0	8.56	54.65	86.3
7	250	0.7	1	1	3.5	0	0.73	1	0.1	8	37	0	0.24	678	35	0	13.15	49.88	100	80.7	40	0	10.91	52.72	95.9	34.9	43.2	0	7.34	55.57	65	37.9	42.9	0	7.92	55.21	70.2	674.2	38.8	0	13.14	51.93	99.9	54.6	41.8	0	9.95	53.93	88
7	250	0.7	1	1	3.5	0	0.73	1	0.1	9	37	0	0.27	678	35	0	14.54	49.16	100	84	40	0	12.3	52	96.3	37.2	43.2	0	8.72	54.86	68.9	40.1	42.9	0	9.3	54.49	73.4	674.2	38.8	0	14.53	51.21	99.9	56.8	41.8	0	11.34	53.22	89.2
7	250	0.7	1	1	3.5	0	0.73	1	0.1	10	37	0	0.3	678	35	0	15.93	48.45	100	87	40	0	13.69	51.29	96.6	39.2	43.3	0	10.11	54.14	71.9	42	43	0	10.69	53.78	76	674.2	38.8	0	15.92	50.49	99.9	58.9	41.8	0	12.72	52.5	90.3
7	250	0.7	1	1	3.5	0	0.73	1	0.1	11	37	0	0.33	678.1	34.9	0	17.32	47.73	100	89.9	40	0	15.07	50.57	96.8	40.9	43.3	0	11.5	53.42	74.4	43.8	43	0	12.08	53.06	78.2	674.2	38.8	0	17.3	49.77	99.9	60.8	41.8	0	14.11	51.78	91.1
7	250	0.7	1	1	3.5	0	0.73	1	0.1	12	37	0	0.36	678.1	34.9	0	18.71	47.02	100	92.7	40	0	16.46	49.85	97	42.5	43.4	0	12.89	52.71	76.5	45.3	43.1	0	13.47	52.34	80	674.3	38.7	0	18.69	49.06	99.9	62.7	41.8	0	15.5	51.07	91.8
7	250	0.7	1	1	3.5	0	0.73	1	0.1	13	37	0	0.39	678.1	34.9	0	20.1	46.31	100	95.4	40	0	17.85	49.14	97.2	44	43.5	0	14.28	51.99	78.3	46.8	43.1	0	14.86	51.63	81.5	674.3	38.7	0	20.08	48.34	99.9	64.4	41.9	0	16.89	50.35	92.4
7	250	0.7	1	1	3.5	0	0.73	1	0.1	14	37	0	0.42	678.2	34.8	0	21.48	45.59	100	97.9	40	0	19.24	48.42	97.4	45.3	43.5	0	15.67	51.28	79.8	48.1	43.2	0	16.25	50.91	82.8	674.3	38.7	0	21.47	47.62	99.9	66.1	41.9	0	18.28	49.63	92.9
7	250	0.7	1	1	3.5	0	0.73	1	0.1	15	37	0	0.45	678.2	34.8	0	22.87	44.88	100	100.3	40	0	20.63	47.7	97.5	46.6	43.6	0	17.06	50.56	81.2	49.4	43.2	0	17.64	50.19	83.9	674.3	38.7	0	22.86	46.9	99.9	67.7	41.9	0	19.67	48.91	93.4
7	250	0.5	1	1	3.5	0	0.31	1	0.1	5	37	0	0.15	676.8	36.2	0	8.98	52.63	99.9	232.8	40	0	7.62	54.72	99.5	30.7	43.4	0	4.05	57.58	56.9	34.4	43.4	0	4.54	57.41	63.8	670.7	42.3	0	8.96	55.88	99.9	54.8	43.5	0	6.26	56.82	87.7
7	250	0.5	1	1	3.5	0	0.31	1	0.1	6	37	0	0.18	676.9	36.1	0	10.37	51.91	99.9	234.5	40	0	9.01	54.01	99.5	34.4	43.4	0	5.43	56.86	63.9	37.9	43.5	0	5.93	56.69	69.7	670.7	42.3	0	10.35	55.17	99.9	58.2	43.5	0	7.65	56.1	89.6
7	250	0.5	1	1	3.5	0	0.31	1	0.1	7	37	0	0.21	676.9	36.1	0	11.76	51.2	99.9	236.2	40	0	10.4	53.29	99.6	37.4	43.5	0	6.82	56.15	69	40.7	43.5	0	7.32	55.98	73.9	670.7	42.3	0	11.74	54.45	99.9	61.3	43.5	0	9.03	55.38	91
7	250	0.5	1	1	3.5	0	0.31	1	0.1	8	37	0	0.24	676.9	36.1	0	13.15	50.48	99.9	237.8	40	0	11.78	52.58	99.6	39.9	43.5	0	8.21	55.43	72.8	43.1	43.5	0	8.7	55.26	77.1	670.7	42.3	0	13.13	53.73	99.9	64.1	43.5	0	10.42	54.67	92
7	250	0.5	1	1	3.5	0	0.31	1	0.1	9	37	0	0.27	676.9	36.1	0	14.53	49.77	99.9	239.4	40	0	13.17	51.86	99.6	42	43.6	0	9.6	54.72	75.8	45.2	43.6	0	10.09	54.55	79.6	670.7	42.3	0	14.51	53.01	99.9	66.7	43.6	0	11.81	53.95	92.8
7	250	0.5	1	1	3.5	0	0.31	1	0.1	10	37	0	0.3	676.9	36.1	0	15.92	49.06	99.9	240.9	40	0	14.56	51.14	99.6	43.9	43.6	0	10.99	54	78.1	47.1	43.6	0	11.48	53.83	81.6	670.7	42.3	0	15.9	52.29	99.9	69.1	43.6	0	13.2	53.23	93.5
7	250	0.5	1	1	3.5	0	0.31	1	0.1	11	37	0	0.33	677	36	0	17.31	48.34	99.9	242.4	40	0	15.95	50.43	99.6	45.7	43.7	0	12.38	53.29	80.1	48.9	43.7	0	12.87	53.11	83.2	670.7	42.3	0	17.29	51.58	99.9	71.4	43.6	0	14.59	52.52	94
7	250	0.5	1	1	3.5	0	0.31	1	0.1	12	37	0	0.36	677	36	0	18.7	47.63	99.9	243.8	40	0	17.34	49.71	99.6	47.2	43.7	0	13.77	52.57	81.7	50.5	43.7	0	14.26	52.4	84.6	670.7	42.3	0	18.68	50.86	99.9	73.6	43.7	0	15.98	51.8	94.5
7	250	0.5	1	1	3.5	0	0.31	1	0.1	13	37	0	0.39	677	36	0	20.09	46.91	99.9	245.2	40	0	18.73	49	99.6	48.7	43.8	0	15.16	51.85	83.1	51.9	43.8	0	15.65	51.68	85.8	670.6	42.4	0	20.07	50.14	99.9	75.7	43.7	0	17.37	51.08	94.9
7	250	0.5	1	1	3.5	0	0.31	1	0.1	14	37	0	0.42	677	36	0	21.48	46.2	99.9	246.6	40	0	20.12	48.28	99.6	50.1	43.8	0	16.55	51.14	84.3	53.3	43.8	0	17.04	50.97	86.7	670.6	42.4	0	21.46	49.42	99.9	77.7	43.7	0	18.76	50.37	95.2
7	250	0.5	1	1	3.5	0	0.32	1	0.1	15	37	0	0.45	677	36	0	22.87	45.48	99.9	248	40	0	21.51	47.57	99.6	51.3	43.9	0	17.94	50.42	85.3	54.7	43.9	0	18.43	50.25	87.6	670.6	42.4	0	22.85	48.7	99.9	79.7	43.7	0	20.15	49.65	95.5
					Hb	Qs/Qt 0.5 SaO2	Qs/Qt 0.5 SvO2	Qs/Qt 0.7 SaO2	Qs/Qt 07 SvO2	Qs/Qt 0.9 SaO2	Qs/Qt 0.9 SvO2
					5	99.5	56.9	94	44.5	77	26.7
					6	99.5	63.9	94.8	53.6	80.7	38.7
					7	99.6	69	95.4	60.1	83.4	47.3
					8	99.6	72.8	95.9	65	85.4	53.8
					9	99.6	75.8	96.3	68.9	87	58.9
					10	99.6	78.1	96.6	71.9	88.2	63
					11	99.6	80.1	96.8	74.4	89.2	66.3
					12	99.6	81.7	97	76.5	90.1	69.1
					13	99.6	83.1	97.2	78.3	90.8	71.4
					14	99.6	84.3	97.4	79.8	91.5	73.4
					15	99.6	85.3	97.5	81.2	92	75.2
					These two graphs do not have the "zero" value for Qec that is on Zanella's graph.
					The approach that I have used maintains alveolar V/Q constant, and maintains PaCO2
					at 40 by adjusting oxygenator ventilation. At Qec of zero, adjusting oxygenator ventilation
					has no effect on PaCO2, so this will not work. One could regard Zanella's model
					as simultaneously adjusting alveolar and oxygenator ventilation to get PaCO2 of
					40, but this is an artifical situation created by his model.
					Hb	Qs/Qt 0.5 PaO2	Qs/Qt 0.7 PaO2	Qs/Qt 0.9 PaO2
					5	232.8	69.3	42
					6	234.5	73.4	45.1
					7	236.2	77.2	47.8
					8	237.8	80.7	50.1
					9	239.4	84	52.2
					10	240.9	87	54.2
					11	242.4	89.9	56
					12	243.8	92.7	57.7
					13	245.2	95.4	59.3
					14	246.6	97.9	60.8
					15	248	100.3	62.3

## Sheet: Fig 6
Input parameters														Output parameters
Qpa	VO2	SF_lung	lung_VQratio	FIO2	Q_ec	SF_ec	oxy_VQratio	FoxyO2	RCF_ec	haemoglobin	temp	DP50	hct	PAO2	PACO2	PAN2	CAO2	CACO2	SAO2	PaO2	PaCO2	PaN2	CaO2	CaCO2	SaO2	PvO2	PvCO2	PvN2	CvO2	CvCO2	SvO2	PpreO2	PpreCO2	PpreN2	CpreO2	CpreCO2	SpreO2	PpostO2	PpostCO2	PpostN2	CpostO2	CpostCO2	SpostO2	PpaO2	PpaCO2	PpaN2	CpaO2	CpaCO2	SpaO2
7	250	0.9	1	0.2	3.5	0	1.17	1	0.1	11	37	0	0.33	121.9	34.4	556.7	15.43	47.5	98.5	52.1	40	111.2	13.44	51.08	86.8	34.1	43.2	111.2	9.86	53.94	63.8	36.8	42.6	100.2	10.61	53.39	68.7	675.5	36.3	1.2	17.31	48.47	99.9	50.4	40.6	61.7	13.21	51.48	85.4
7	250	0.9	1	0.3	3.5	0	1.17	1	0.1	11	37	0	0.33	190.3	34.4	488.3	15.77	47.47	99.4	52.7	40	97.6	13.5	51.06	87.3	34.4	43.2	97.6	9.93	53.92	64.3	37.1	42.6	87.9	10.67	53.37	69.1	675.7	36.2	1.1	17.31	48.45	99.9	50.7	40.6	54.2	13.25	51.46	85.7
7	250	0.9	1	0.4	3.5	0	1.17	1	0.1	11	37	0	0.33	259.5	34.4	419.2	16.02	47.46	99.7	53.2	40	83.7	13.55	51.04	87.6	34.6	43.2	83.7	9.98	53.9	64.6	37.3	42.6	75.5	10.71	53.35	69.3	675.9	36.2	0.9	17.31	48.44	99.9	50.9	40.6	46.5	13.28	51.44	85.9
7	250	0.9	1	0.5	3.5	0	1.17	1	0.1	11	37	0	0.33	328.9	34.4	349.7	16.24	47.44	99.8	53.6	40	69.9	13.6	51.03	87.9	34.7	43.2	69.9	10.03	53.89	64.9	37.4	42.6	63	10.76	53.34	69.6	676	36.2	0.8	17.31	48.42	99.9	51.1	40.6	38.8	13.3	51.43	86
7	250	0.9	1	0.6	3.5	0	1.17	1	0.1	11	37	0	0.33	398.6	34.4	280.1	16.46	47.43	99.9	54.1	40	56	13.64	51.01	88.2	34.9	43.2	56	10.07	53.87	65.2	37.6	42.6	50.4	10.8	53.32	69.9	676.2	36.2	0.6	17.31	48.41	99.9	51.3	40.6	31.1	13.33	51.41	86.2
7	250	0.9	1	0.7	3.5	0	1.17	1	0.1	11	37	0	0.33	468.4	34.3	210.3	16.68	47.42	99.9	54.5	40	42	13.69	51	88.4	35.1	43.2	42	10.11	53.86	65.5	37.8	42.6	37.9	10.83	53.31	70.1	676.4	36.1	0.5	17.31	48.39	99.9	51.5	40.6	23.3	13.35	51.4	86.3
7	250	0.9	1	0.8	3.5	0	1.18	1	0.1	11	37	0	0.33	538.3	34.3	140.3	16.89	47.41	99.9	55	40	28	13.73	50.99	88.7	35.2	43.2	28	10.16	53.84	65.7	37.9	42.6	25.3	10.87	53.3	70.4	676.6	36.1	0.3	17.31	48.38	99.9	51.7	40.5	15.6	13.38	51.38	86.5
7	250	0.9	1	0.9	3.5	0	1.18	1	0.1	11	37	0	0.33	608.5	34.3	70.2	17.11	47.39	99.9	55.5	40	14	13.77	50.97	89	35.4	43.2	14	10.2	53.83	66	38.1	42.6	12.6	10.91	53.28	70.6	676.8	36.1	0.2	17.31	48.36	99.9	51.9	40.5	7.8	13.4	51.37	86.6
7	250	0.9	1	1	3.5	0	1.18	1	0.1	11	37	0	0.33	678.7	34.3	0	17.32	47.38	100	56	40	0	13.81	50.96	89.2	35.6	43.2	0	10.24	53.82	66.3	38.2	42.6	0	10.95	53.27	70.9	676.9	36.1	0	17.31	48.35	99.9	52.2	40.5	0	13.42	51.36	86.8
7	250	0.7	1	0.2	3.5	0	0.72	1	0.1	11	37	0	0.33	124	35.3	553.7	15.44	47.99	98.5	60.6	40	272.6	14.15	50.84	91.4	36.9	43.2	272.6	10.58	53.7	68.5	39.6	43	245.9	11.25	53.34	72.8	668.7	39.3	4.9	17.29	50.08	99.9	54.4	42.1	152.2	13.6	52.07	87.9
7	250	0.7	1	0.3	3.5	0	0.72	1	0.1	11	37	0	0.33	192.3	35.2	485.5	15.77	47.94	99.4	63.4	40	239	14.31	50.8	92.4	37.5	43.3	239	10.74	53.65	69.5	40.3	43	215.6	11.4	53.29	73.8	669.4	39.2	4.3	17.29	50.03	99.9	55.4	42	133.4	13.69	52.02	88.4
7	250	0.7	1	0.4	3.5	0	0.72	1	0.1	11	37	0	0.33	261.2	35.2	416.6	16.02	47.9	99.7	65.9	40	205.1	14.44	50.76	93.1	38.1	43.3	205.1	10.87	53.62	70.3	40.8	43	185	11.51	53.25	74.5	670.1	39.2	3.7	17.29	49.99	99.9	56.2	42	114.5	13.76	51.98	88.9
7	250	0.7	1	0.5	3.5	0	0.72	1	0.1	11	37	0	0.33	330.3	35.2	347.6	16.25	47.87	99.8	68.5	40	171.1	14.55	50.72	93.8	38.5	43.3	171.1	10.98	53.58	71	41.3	43	154.3	11.61	53.22	75.1	670.8	39.1	3.1	17.29	49.95	99.9	56.9	42	95.5	13.82	51.95	89.3
7	250	0.7	1	0.6	3.5	0	0.72	1	0.1	11	37	0	0.33	399.6	35.1	278.3	16.47	47.84	99.9	71.5	40	137	14.66	50.69	94.5	39	43.3	137	11.08	53.54	71.7	41.8	43	123.6	11.71	53.18	75.7	671.5	39	2.5	17.3	49.9	99.9	57.6	41.9	76.5	13.88	51.91	89.6
7	250	0.7	1	0.7	3.5	0	0.73	1	0.1	11	37	0	0.33	469	35.1	208.9	16.68	47.81	99.9	74.9	40	102.9	14.76	50.65	95.1	39.5	43.3	102.9	11.19	53.51	72.4	42.3	43	92.8	11.8	53.15	76.4	672.2	38.9	1.8	17.3	49.87	99.9	58.3	41.9	57.4	13.94	51.87	90
7	250	0.7	1	0.8	3.5	0	0.73	1	0.1	11	37	0	0.33	538.6	35	139.4	16.89	47.78	99.9	78.9	40	68.6	14.87	50.62	95.7	39.9	43.3	68.6	11.3	53.48	73.1	42.8	43	61.9	11.9	53.12	77	672.9	38.9	1.2	17.3	49.84	99.9	59.1	41.9	38.3	14	51.84	90.4
7	250	0.7	1	0.9	3.5	0	0.73	1	0.1	11	37	0	0.33	608.3	35	69.8	17.11	47.76	99.9	83.9	40	34.3	14.97	50.59	96.3	40.4	43.3	34.3	11.4	53.45	73.8	43.2	43	31	11.99	53.09	77.6	673.6	38.8	0.6	17.3	49.8	99.9	60	41.8	19.2	14.06	51.81	90.8
7	250	0.7	1	1	3.5	0	0.73	1	0.1	11	37	0	0.33	678.1	34.9	0	17.32	47.73	100	89.9	40	0	15.07	50.57	96.8	40.9	43.3	0	11.5	53.42	74.4	43.8	43	0	12.08	53.06	78.2	674.2	38.8	0	17.3	49.77	99.9	60.8	41.8	0	14.11	51.78	91.1
7	250	0.5	1	0.2	3.5	0	0.3	1	0.1	11	37	0	0.33	125.3	36.4	551.3	15.44	48.59	98.5	71.1	40	385.2	14.65	50.69	94.4	39	43.3	385.2	11.07	53.55	71.7	41.8	43.4	348.3	11.69	53.38	75.6	653.9	43	16.2	17.24	51.88	99.9	57.9	43.7	219.2	13.85	52.8	89.4
7	250	0.5	1	0.3	3.5	0	0.3	1	0.1	11	37	0	0.33	193.4	36.3	483.2	15.78	48.52	99.4	79.4	40	337.6	14.88	50.62	95.7	40	43.3	337.6	11.31	53.48	73.2	42.9	43.4	305.3	11.9	53.31	77	656.1	42.8	14.1	17.25	51.81	99.9	59.6	43.7	192	13.98	52.73	90.3
7	250	0.5	1	0.4	3.5	0	0.31	1	0.1	11	37	0	0.33	262.1	36.3	414.6	16.02	48.47	99.7	88.5	40	289.7	15.05	50.57	96.7	40.8	43.3	289.7	11.48	53.43	74.3	43.7	43.4	261.9	12.06	53.26	78	658.3	42.7	12	17.26	51.75	99.9	61.1	43.6	164.7	14.08	52.67	90.9
7	250	0.5	1	0.5	3.5	0	0.31	1	0.1	11	37	0	0.33	331	36.2	345.8	16.25	48.44	99.8	100.3	40	241.6	15.21	50.53	97.5	41.6	43.4	241.6	11.64	53.39	75.3	44.5	43.4	218.4	12.2	53.22	78.9	660.5	42.6	9.9	17.26	51.7	99.9	62.5	43.6	137.4	14.17	52.63	91.4
7	250	0.5	1	0.6	3.5	0	0.31	1	0.1	11	37	0	0.33	399.9	36.1	276.9	16.47	48.4	99.9	116.4	40	193.4	15.36	50.5	98.2	42.3	43.4	193.4	11.79	53.36	76.3	45.3	43.4	174.9	12.34	53.19	79.8	662.6	42.5	7.9	17.27	51.66	99.9	63.9	43.6	109.9	14.26	52.59	92
7	250	0.5	1	0.7	3.5	0	0.31	1	0.1	11	37	0	0.33	469.1	36.1	207.8	16.68	48.38	99.9	138.6	40	145.2	15.51	50.47	98.7	43.1	43.5	145.2	11.94	53.33	77.2	46.2	43.5	131.2	12.47	53.16	80.7	664.7	42.4	5.9	17.28	51.63	99.9	65.5	43.6	82.5	14.34	52.56	92.5
7	250	0.5	1	0.8	3.5	0	0.31	1	0.1	11	37	0	0.33	538.3	36.1	138.7	16.89	48.36	99.9	167.5	40	96.8	15.66	50.45	99.1	43.9	43.5	96.8	12.09	53.31	78.2	47	43.5	87.6	12.61	53.14	81.5	666.7	42.4	3.9	17.28	51.6	99.9	67.3	43.6	55	14.42	52.54	93
7	250	0.5	1	0.9	3.5	0	0.31	1	0.1	11	37	0	0.33	607.6	36.1	69.4	17.1	48.35	99.9	202.6	40	48.5	15.81	50.44	99.4	44.8	43.6	48.5	12.23	53.29	79.1	47.9	43.6	43.8	12.74	53.12	82.4	668.7	42.4	2	17.29	51.59	99.9	69.2	43.6	27.5	14.51	52.53	93.5
7	250	0.5	1	1	3.5	0	0.31	1	0.1	11	37	0	0.33	677	36	0	17.31	48.34	99.9	242.4	40	0	15.95	50.43	99.6	45.7	43.7	0	12.38	53.29	80.1	48.9	43.7	0	12.87	53.11	83.2	670.7	42.3	0	17.29	51.58	99.9	71.4	43.6	0	14.59	52.52	94
					FIO2	Qs/Qt 0.5 SaO2	Qs/Qt 0.5 SvO2	Qs/Qt 0.7 SaO2	Qs/Qt 07 SvO2	Qs/Qt 0.9 SaO2	Qs/Qt 0.9 SvO2
					0.2	94.4	71.7	91.4	68.5	86.8	63.8
					0.3	95.7	73.2	92.4	69.5	87.3	64.3
					0.4	96.7	74.3	93.1	70.3	87.6	64.6
					0.5	97.5	75.3	93.8	71	87.9	64.9
					0.6	98.2	76.3	94.5	71.7	88.2	65.2
					0.7	98.7	77.2	95.1	72.4	88.4	65.5
					0.8	99.1	78.2	95.7	73.1	88.7	65.7
					0.9	99.4	79.1	96.3	73.8	89	66
					1	99.6	80.1	96.8	74.4	89.2	66.3
					These two graphs do not have the "zero" value for Qec that is on Zanella's graph.
					The approach that I have used maintains alveolar V/Q constant, and maintains PaCO2
					at 40 by adjusting oxygenator ventilation. At Qec of zero, adjusting oxygenator ventilation
					has no effect on PaCO2, so this will not work. One could regard Zanella's model
					as simultaneously adjusting alveolar and oxygenator ventilation to get PaCO2 of
					40, but this is an artifical situation created by his model.
					Qec	Qs/Qt 0.5 PaO2	Qs/Qt 0.7 PaO2	Qs/Qt 0.9 PaO2
					0.2	71.1	60.6	52.1
					0.3	79.4	63.4	52.7
					0.4	88.5	65.9	53.2
					0.5	100.3	68.5	53.6
					0.6	116.4	71.5	54.1
					0.7	138.6	74.9	54.5
					0.8	167.5	78.9	55
					0.9	202.6	83.9	55.5
					1	242.4	89.9	56

## Sheet: Fig 7
Input parameters														Output parameters
Qpa		SF_lung	lung_VQratio	FIO2	Q_ec	SF_ec	oxy_VQratio	FoxyO2	RCF_ec	haemoglobin	temp	DP50	hct	PAO2	PACO2	PAN2	CAO2	CACO2	SAO2	PaO2	PaCO2	PaN2	CaO2	CaCO2	SaO2	PvO2	PvCO2	PvN2	CvO2	CvCO2	SvO2	PpreO2	PpreCO2	PpreN2	CpreO2	CpreCO2	SpreO2	PpostO2	PpostCO2	PpostN2	CpostO2	CpostCO2	SpostO2	PpaO2	PpaCO2	PpaN2	CpaO2	CpaCO2	SpaO2
7	250	0.9	1	1	3.5	0	1.15	0.2	0.1	11	37	0	0.33	670.4	35.1	7.4	17.29	47.86	99.9	43	40	464	12.13	51.52	78.5	29.7	43.2	464	8.56	54.38	55.4	31.7	42.6	475.3	9.22	53.83	59.7	99.3	36.9	576.7	15.22	48.93	97.6	40.3	40.4	514.7	11.56	51.93	74.8
7	250	0.9	1	1	3.5	0	1.15	0.3	0.1	11	37	0	0.33	671.5	34.9	6.5	17.3	47.75	100	45.2	40	406.2	12.5	51.39	80.9	30.9	43.2	406.2	8.93	54.25	57.8	33	42.6	416.1	9.61	53.7	62.2	171.3	36.8	504.9	15.68	48.8	99.2	42.3	40.4	450.6	11.97	51.8	77.4
7	250	0.9	1	1	3.5	0	1.15	0.4	0.1	11	37	0	0.33	672.6	34.8	5.6	17.3	47.69	100	46.6	40	348.3	12.72	51.32	82.3	31.6	43.2	348.3	9.15	54.18	59.2	33.9	42.6	356.7	9.83	53.63	63.6	243.4	36.7	432.9	15.96	48.72	99.6	43.7	40.4	386.3	12.22	51.72	79
7	250	0.9	1	1	3.5	0	1.16	0.5	0.1	11	37	0	0.33	673.6	34.7	4.7	17.3	47.63	100	47.9	40	290.3	12.92	51.25	83.5	32.3	43.2	290.3	9.35	54.11	60.5	34.6	42.6	297.3	10.03	53.56	64.9	315.6	36.6	360.8	16.2	48.65	99.8	44.9	40.5	322	12.43	51.65	80.4
7	250	0.9	1	1	3.5	0	1.16	0.6	0.1	11	37	0	0.33	674.6	34.6	3.7	17.31	47.58	100	49.3	40	232.2	13.1	51.19	84.7	32.9	43.2	232.2	9.53	54.05	61.7	35.3	42.6	237.9	10.22	53.5	66.2	387.8	36.5	288.7	16.43	48.59	99.8	46.2	40.5	257.6	12.64	51.59	81.7
7	250	0.9	1	1	3.5	0	1.17	0.7	0.1	11	37	0	0.33	675.7	34.5	2.8	17.31	47.53	100	50.7	40	174.2	13.28	51.13	85.9	33.6	43.2	174.2	9.71	53.99	62.9	36	42.6	178.4	10.41	53.44	67.3	460.1	36.4	216.5	16.65	48.53	99.9	47.5	40.5	193.2	12.84	51.53	83
7	250	0.9	1	1	3.5	0	1.17	0.8	0.1	11	37	0	0.33	676.7	34.5	1.9	17.31	47.48	100	52.3	40	116.1	13.46	51.07	87	34.2	43.2	116.1	9.89	53.93	64	36.7	42.6	119	10.59	53.38	68.5	532.4	36.3	144.4	16.87	48.47	99.9	48.9	40.5	128.8	13.03	51.47	84.3
7	250	0.9	1	1	3.5	0	1.17	0.9	0.1	11	37	0	0.33	677.7	34.4	0.9	17.32	47.43	100	54	40	58.1	13.64	51.01	88.1	34.9	43.2	58.1	10.07	53.87	65.2	37.5	42.6	59.5	10.77	53.32	69.7	604.7	36.2	72.2	17.09	48.4	99.9	50.5	40.5	64.4	13.23	51.41	85.5
7	250	0.9	1	1	3.5	0	1.18	1	0.1	11	37	0	0.33	678.7	34.3	0	17.32	47.38	100	56	40	0	13.81	50.95	89.2	35.6	43.2	0	10.24	53.81	66.3	38.2	42.6	0	10.95	53.27	70.9	677	36	0	17.31	48.35	99.9	52.2	40.5	0	13.42	51.35	86.8
7	250	0.7	1	1	3.5	0	0.71	0.2	0.1	11	37	0	0.33	671.4	35.5	6.2	17.3	48.03	99.9	57.8	40	299.7	13.96	50.91	90.2	36.1	43.2	299.7	10.39	53.77	67.2	37.9	42.9	327.7	10.86	53.41	70.3	94.4	39.2	579.3	15.14	50.16	97.2	45.8	41.5	425.6	12.53	52.14	81
7	250	0.7	1	1	3.5	0	0.72	0.3	0.1	11	37	0	0.33	672.3	35.3	5.4	17.3	47.96	99.9	61.7	40	263	14.22	50.83	91.8	37.2	43.3	263	10.65	53.68	68.9	39.2	42.9	287.5	11.15	53.32	72.1	165.5	39.2	508.2	15.65	50.06	99.1	48.3	41.6	373.3	12.9	52.05	83.4
7	250	0.7	1	1	3.5	0	0.72	0.4	0.1	11	37	0	0.33	673.1	35.3	4.6	17.3	47.92	100	64.4	40	225.6	14.37	50.78	92.7	37.8	43.3	225.6	10.8	53.64	69.9	39.9	42.9	246.7	11.31	53.27	73.2	237.7	39.2	436.1	15.94	50.01	99.6	49.9	41.6	320.3	13.11	52	84.8
7	250	0.7	1	1	3.5	0	0.72	0.5	0.1	11	37	0	0.33	673.9	35.2	3.9	17.3	47.88	100	67.2	40	188.2	14.49	50.74	93.5	38.3	43.3	188.2	10.92	53.6	70.7	40.5	42.9	205.7	11.45	53.23	74.1	310.2	39.1	363.7	16.18	49.97	99.7	51.4	41.6	267.1	13.29	51.96	85.9
7	250	0.7	1	1	3.5	0	0.72	0.6	0.1	11	37	0	0.33	674.8	35.1	3.1	17.31	47.85	100	70.2	40	150.6	14.61	50.7	94.2	38.8	43.3	150.6	11.04	53.56	71.5	41.2	42.9	164.7	11.58	53.2	74.9	382.8	39	291.1	16.41	49.92	99.8	52.9	41.7	213.8	13.46	51.92	87
7	250	0.7	1	1	3.5	0	0.73	0.7	0.1	11	37	0	0.33	675.6	35.1	2.3	17.31	47.82	100	73.8	40	113	14.73	50.67	94.9	39.3	43.3	113	11.16	53.52	72.2	41.8	42.9	123.6	11.71	53.16	75.7	455.6	39	218.5	16.64	49.88	99.9	54.6	41.7	160.5	13.62	51.89	88
7	250	0.7	1	1	3.5	0	0.73	0.8	0.1	11	37	0	0.33	676.4	35	1.5	17.31	47.79	100	78.1	40	75.4	14.85	50.63	95.6	39.8	43.3	75.4	11.27	53.49	73	42.4	43	82.4	11.83	53.12	76.6	528.4	38.9	145.7	16.86	49.85	99.9	56.4	41.7	107	13.79	51.85	89.1
7	250	0.7	1	1	3.5	0	0.73	0.9	0.1	11	37	0	0.33	677.3	35	0.8	17.31	47.76	100	83.3	40	37.7	14.96	50.6	96.2	40.4	43.3	37.7	11.39	53.46	73.7	43.1	43	41.2	11.96	53.09	77.4	601.3	38.8	72.9	17.08	49.81	99.9	58.5	41.8	53.6	13.95	51.82	90.1
7	250	0.7	1	1	3.5	0	0.73	1	0.1	11	37	0	0.33	678.1	34.9	0	17.32	47.73	100	89.9	40	0	15.07	50.57	96.8	40.9	43.3	0	11.5	53.42	74.4	43.8	43	0	12.08	53.06	78.2	674.2	38.8	0	17.3	49.77	99.9	60.8	41.8	0	14.11	51.78	91.1
7	250	0.5	1	1	3.5	0	0.31	0.2	0.1	11	37	0	0.33	671.4	36.2	5.4	17.3	48.45	99.9	94.8	40	188.8	15.14	50.55	97.2	41.2	43.4	188.8	11.57	53.41	74.9	42.8	43.2	229.5	11.89	53.24	76.9	74.6	42.1	596.3	14.72	51.72	94.8	49.4	42.8	372.2	12.99	52.65	84
7	250	0.5	1	1	3.5	0	0.31	0.3	0.1	11	37	0	0.33	672.1	36.1	4.8	17.3	48.4	99.9	120.3	40	167.6	15.39	50.49	98.3	42.5	43.4	167.6	11.82	53.35	76.5	44.4	43.3	203.8	12.19	53.18	78.9	141.1	42.4	529.5	15.52	51.65	98.7	53.7	43	330.5	13.48	52.59	87.1
7	250	0.5	1	1	3.5	0	0.31	0.4	0.1	11	37	0	0.33	672.8	36.1	4.1	17.3	48.38	99.9	136	40	144.3	15.5	50.47	98.7	43	43.4	144.3	11.92	53.33	77.1	45.2	43.4	175.5	12.32	53.16	79.7	214.8	42.4	455.8	15.85	51.63	99.4	55.9	43.1	284.5	13.69	52.57	88.4
7	250	0.5	1	1	3.5	0	0.31	0.5	0.1	11	37	0	0.33	673.5	36.1	3.4	17.3	48.37	99.9	151	40	120.6	15.58	50.46	98.9	43.5	43.5	120.6	12.01	53.32	77.7	45.8	43.4	146.6	12.42	53.15	80.3	289.7	42.4	380.9	16.11	51.62	99.7	57.8	43.2	237.7	13.85	52.55	89.5
7	250	0.5	1	1	3.5	0	0.31	0.6	0.1	11	37	0	0.33	674.2	36.1	2.8	17.3	48.36	99.9	166.9	40	96.7	15.66	50.45	99.1	43.9	43.5	96.7	12.08	53.31	78.2	46.4	43.5	117.6	12.51	53.14	80.9	365.2	42.4	305.4	16.36	51.6	99.8	59.9	43.3	190.6	14.01	52.54	90.4
7	250	0.5	1	1	3.5	0	0.31	0.7	0.1	11	37	0	0.33	674.9	36.1	2.1	17.31	48.35	99.9	184	40	72.7	15.73	50.44	99.3	44.3	43.6	72.7	12.16	53.3	78.7	47	43.5	88.4	12.6	53.13	81.5	441.1	42.4	229.6	16.59	51.59	99.9	62.1	43.4	143.3	14.15	52.53	91.4
7	250	0.5	1	1	3.5	0	0.31	0.8	0.1	11	37	0	0.33	675.6	36.1	1.4	17.31	48.35	99.9	202.4	40	48.6	15.8	50.44	99.4	44.8	43.6	48.6	12.23	53.29	79.1	47.6	43.6	59	12.69	53.12	82.1	517.3	42.3	153.4	16.83	51.59	99.9	64.7	43.5	95.7	14.3	52.53	92.3
7	250	0.5	1	1	3.5	0	0.31	0.9	0.1	11	37	0	0.33	676.3	36	0.7	17.31	48.34	99.9	221.9	40	24.3	15.88	50.43	99.5	45.2	43.6	24.3	12.31	53.29	79.6	48.2	43.6	29.6	12.78	53.12	82.7	593.8	42.3	76.9	17.06	51.58	99.9	67.7	43.5	48	14.45	52.52	93.2
7	250	0.5	1	1	3.5	0	0.31	1	0.1	11	37	0	0.33	677	36	0	17.31	48.34	99.9	242.4	40	0	15.95	50.43	99.6	45.7	43.7	0	12.38	53.29	80.1	48.9	43.7	0	12.87	53.11	83.2	670.7	42.3	0	17.29	51.58	99.9	71.4	43.6	0	14.59	52.52	94
					FoxyO2	Qs/Qt 0.5 SaO2	Qs/Qt 0.5 SvO2	Qs/Qt 0.7 SaO2	Qs/Qt 07 SvO2	Qs/Qt 0.9 SaO2	Qs/Qt 0.9 SvO2
					0.2	97.2	74.9	90.2	67.2	78.5	55.4
					0.3	98.3	76.5	91.8	68.9	80.9	57.8
					0.4	98.7	77.1	92.7	69.9	82.3	59.2
					0.5	98.9	77.7	93.5	70.7	83.5	60.5
					0.6	99.1	78.2	94.2	71.5	84.7	61.7
					0.7	99.3	78.7	94.9	72.2	85.9	62.9
					0.8	99.4	79.1	95.6	73	87	64
					0.9	99.5	79.6	96.2	73.7	88.1	65.2
					1	99.6	80.1	96.8	74.4	89.2	66.3
					These two graphs do not have the "zero" value for Qec that is on Zanella's graph.
					The approach that I have used maintains alveolar V/Q constant, and maintains PaCO2
					at 40 by adjusting oxygenator ventilation. At Qec of zero, adjusting oxygenator ventilation
					has no effect on PaCO2, so this will not work. One could regard Zanella's model
					as simultaneously adjusting alveolar and oxygenator ventilation to get PaCO2 of
					40, but this is an artifical situation created by his model.
					FoxyO2	Qs/Qt 0.5 PaO2	Qs/Qt 0.7 PaO2	Qs/Qt 0.9 PaO2
					0.2	94.8	57.8	43
					0.3	120.3	61.7	45.2
					0.4	136	64.4	46.6
					0.5	151	67.2	47.9
					0.6	166.9	70.2	49.3
					0.7	184	73.8	50.7
					0.8	202.4	78.1	52.3
					0.9	221.9	83.3	54
					1	242.4	89.9	56

## Sheet: Fig 8
Input parameters														Output parameters
Qpa	VO2	SF_lung	lung_VQratio	FIO2	Q_ec	SF_ec	oxy_VQratio	FoxyO2	RCF_ec	haemoglobin	temp	DP50	hct	PAO2	PACO2	PAN2	CAO2	CACO2	SAO2	PaO2	PaCO2	PaN2	CaO2	CaCO2	SaO2	PvO2	PvCO2	PvN2	CvO2	CvCO2	SvO2	PpreO2	PpreCO2	PpreN2	CpreO2	CpreCO2	SpreO2	PpostO2	PpostCO2	PpostN2	CpostO2	CpostCO2	SpostO2	PpaO2	PpaCO2	PpaN2	CpaO2	CpaCO2	SpaO2
4	250	0.9	1	1	3.5	0	1.19	1	0.1	11	37	0	0.33	679.5	33.5	0	17.32	46.94	100	208.9	40	0	15.83	50.44	99.4	33.8	46.1	0	9.58	55.44	62	36.5	45.4	0	10.35	54.85	67	674.6	38.4	0	17.31	49.58	99.9	169	40.7	0	15.66	50.82	99.1
4.5	250	0.9	1	1	3.5	0	1.2	1	0.1	11	37	0	0.33	679.4	33.6	0	17.32	47.01	100	104.5	40	0	15.26	50.52	97.7	34	45.2	0	9.7	54.97	62.8	36.7	44.5	0	10.46	54.39	67.7	675.4	37.6	0	17.31	49.17	99.9	87.3	40.6	0	15.03	50.91	96.6
5	250	0.9	1	1	3.5	0	1.2	1	0.1	11	37	0	0.33	679.2	33.8	0	17.32	47.12	100	76.9	40	0	14.82	50.64	95.4	34.3	44.6	0	9.82	54.64	63.5	37	44	0	10.56	54.07	68.4	675.9	37.1	0	17.31	48.91	99.9	68.5	40.6	0	14.54	51.03	93.7
6	250	0.9	1	1	3.5	0	1.19	1	0.1	11	37	0	0.33	678.9	34.1	0	17.32	47.28	100	61.4	40	0	14.2	50.83	91.7	34.9	43.8	0	10.04	54.16	64.9	37.6	43.2	0	10.76	53.6	69.7	676.5	36.5	0	17.31	48.57	99.9	56.7	40.6	0	13.86	51.23	89.5
7	250	0.9	1	1	3.5	0	1.18	1	0.1	11	37	0	0.33	678.7	34.3	0	17.32	47.38	100	56	40	0	13.81	50.96	89.2	35.6	43.2	0	10.24	53.82	66.3	38.2	42.6	0	10.95	53.27	70.9	676.9	36.1	0	17.31	48.35	99.9	52.2	40.5	0	13.42	51.36	86.8
8	250	0.9	1	1	3.5	0	1.16	1	0.1	11	37	0	0.33	678.6	34.4	0	17.32	47.45	100	53.3	40	0	13.56	51.04	87.7	36.2	42.8	0	10.44	53.54	67.6	38.9	42.2	0	11.13	53	72	677.2	35.8	0	17.31	48.2	100	49.8	40.5	0	13.15	51.44	85
9	250	0.9	1	1	3.5	0	1.14	1	0.1	11	37	0	0.33	678.5	34.5	0	17.32	47.5	100	51.7	40	0	13.4	51.09	86.6	36.9	42.5	0	10.62	53.32	68.7	39.5	41.9	0	11.29	52.79	73.1	677.4	35.6	0	17.31	48.11	100	48.4	40.5	0	12.96	51.49	83.8
10	250	0.9	1	1	3.5	0	1.11	1	0.1	11	37	0	0.33	678.5	34.5	0	17.32	47.53	100	50.8	40	0	13.3	51.13	86	37.5	42.3	0	10.8	53.13	69.9	40.2	41.7	0	11.45	52.62	74.1	677.5	35.5	0	17.31	48.05	100	47.6	40.5	0	12.85	51.53	83.1
4	250	0.7	1	1	3.5	0	0.93	1	0.1	11	37	0	0.33	678.3	34.7	0	17.32	47.61	100	320.4	40	0	16.21	50.42	99.8	35.2	46.3	0	9.96	55.42	64.5	38	45.9	0	10.7	54.94	69.2	672.6	40.4	0	17.3	50.6	99.9	187.3	42.4	0	15.74	51.62	99.3
4.5	250	0.7	1	1	3.5	0	0.9	1	0.1	11	37	0	0.33	678.3	34.7	0	17.32	47.62	100	209.1	40	0	15.83	50.44	99.4	36.2	45.4	0	10.28	54.88	66.5	39	45	0	10.98	54.42	71	673.3	39.7	0	17.3	50.26	99.9	100.1	42.2	0	15.19	51.64	97.4
5	250	0.7	1	1	3.5	0	0.88	1	0.1	11	37	0	0.33	678.2	34.8	0	17.32	47.64	100	147.7	40	0	15.56	50.46	98.9	37.2	44.8	0	10.56	54.46	68.3	40	44.4	0	11.24	54.02	72.7	673.7	39.3	0	17.3	50.03	99.9	77.7	42	0	14.81	51.67	95.3
6	250	0.7	1	1	3.5	0	0.81	1	0.1	11	37	0	0.33	678.1	34.9	0	17.32	47.7	100	102.5	40	0	15.23	50.52	97.6	39.1	43.9	0	11.07	53.86	71.6	41.9	43.5	0	11.69	53.45	75.6	674.2	38.8	0	17.3	49.82	99.9	64.8	41.9	0	14.34	51.74	92.5
7	250	0.7	1	1	3.5	0	0.73	1	0.1	11	37	0	0.33	678.1	34.9	0	17.32	47.73	100	89.9	40	0	15.07	50.57	96.8	40.9	43.3	0	11.5	53.42	74.4	43.8	43	0	12.08	53.06	78.2	674.2	38.8	0	17.3	49.77	99.9	60.8	41.8	0	14.11	51.78	91.1
8	250	0.7	1	1	3.5	0	0.65	1	0.1	11	37	0	0.33	678	35	0	17.32	47.75	100	85.8	40	0	15.01	50.59	96.5	42.7	42.9	0	11.88	53.09	76.9	45.6	42.6	0	12.42	52.76	80.4	674.1	38.9	0	17.3	49.82	99.9	59.4	41.8	0	14.02	51.8	90.5
9	250	0.7	1	1	3.5	0	0.57	1	0.1	11	37	0	0.33	678	35	0	17.32	47.76	100	85	40	0	14.99	50.59	96.4	44.4	42.6	0	12.21	52.81	79	47.4	42.4	0	12.72	52.53	82.3	673.9	39.1	0	17.3	49.94	99.9	59.1	41.8	0	14	51.81	90.4
10	250	0.7	1	1	3.5	0	0.49	1	0.1	11	37	0	0.33	678.1	34.9	0	17.32	47.75	100	85.9	40	0	15.01	50.58	96.5	46	42.3	0	12.51	52.58	80.9	49.2	42.2	0	12.99	52.33	84	673.6	39.4	0	17.3	50.09	99.9	59.4	41.8	0	14.02	51.8	90.5
4	250	0.5	1	1	3.5	0	0.67	1	0.1	11	37	0	0.33	677	36	0	17.31	48.33	99.9	430.6	40	0	16.56	50.41	99.9	36.6	46.6	0	10.31	55.41	66.7	39.5	46.3	0	11.01	55.04	71.2	670.4	42.6	0	17.29	51.71	99.9	204.9	44.2	0	15.81	52.5	99.4
4.5	250	0.5	1	1	3.5	0	0.62	1	0.1	11	37	0	0.33	677	36	0	17.31	48.33	99.9	355.1	40	0	16.32	50.42	99.8	38.3	45.7	0	10.77	54.86	69.7	41.2	45.5	0	11.42	54.52	73.9	670.8	42.2	0	17.29	51.49	99.9	115.6	44	0	15.34	52.5	98
5	250	0.5	1	1	3.5	0	0.56	1	0.1	11	37	0	0.33	677	36	0	17.31	48.33	99.9	307.2	40	0	16.17	50.42	99.7	39.9	45.1	0	11.17	54.42	72.3	42.8	44.9	0	11.78	54.12	76.2	671.1	41.9	0	17.29	51.38	99.9	89.2	43.9	0	15.03	52.51	96.5
6	250	0.5	1	1	3.5	0	0.44	1	0.1	11	37	0	0.33	677	36	0	17.31	48.34	99.9	258.7	40	0	16.01	50.42	99.6	42.9	44.3	0	11.84	53.76	76.6	45.9	44.2	0	12.39	53.52	80.1	671.1	41.9	0	17.29	51.38	99.9	74.8	43.7	0	14.7	52.51	94.7
7	250	0.5	1	1	3.5	0	0.31	1	0.1	11	37	0	0.33	677	36	0	17.31	48.34	99.9	242.4	40	0	15.95	50.43	99.6	45.7	43.7	0	12.38	53.29	80.1	48.9	43.7	0	12.87	53.11	83.2	670.7	42.3	0	17.29	51.58	99.9	71.4	43.6	0	14.59	52.52	94
8	250	0.5	1	1	3.5	0	0.19	1	0.1	11	37	0	0.33	677	36	0	17.31	48.34	99.9	241.1	40	0	15.95	50.43	99.6	48.4	43.3	0	12.82	52.93	82.9	51.9	43.4	0	13.27	52.82	85.8	670.1	42.9	0	17.29	51.88	99.9	71.1	43.6	0	14.58	52.51	94
9	250	0.5	1	1	3.5	0	0.07	1	0.1	11	37	0	0.33	677	36	0	17.31	48.34	99.9	247.2	40	0	15.97	50.43	99.6	51.1	42.9	0	13.19	52.65	85.3	54.9	43.2	0	13.6	52.61	87.9	669.3	43.7	0	17.29	52.26	99.9	72.4	43.6	0	14.63	52.51	94.2
					Qpa	Qs/Qt 0.5 SaO2	Qs/Qt 0.5 SvO2	Qs/Qt 0.7 SaO2	Qs/Qt 07 SvO2	Qs/Qt 0.9 SaO2	Qs/Qt 0.9 SvO2
					4	99.9	66.7	99.8	64.5	99.4	62
					4.5	99.8	69.7	99.4	66.5	97.7	62.8
					5	99.7	72.3	98.9	68.3	95.4	63.5
					6	99.6	76.6	97.6	71.6	91.7	64.9
					7	99.6	80.1	96.8	74.4	89.2	66.3
					8	99.6	82.9	96.5	76.9	87.7	67.6
					9	99.6	85.3	96.4	79	86.6	68.7
					10			96.5	80.9	86	69.9
					With Qpa of 10L/min, Qs/Qt of 0.5, and using a VA/Q ratio of 1, the PaCO2 is < 40 even when
					and oxygenator is not incorporated into the circuit. For this reason, there is no
					solution for PaCO2 of 40.
					Qpa	Qs/Qt 0.5 PaO2	Qs/Qt 0.7 PaO2	Qs/Qt 0.9 PaO2
					4	430.6	320.4	208.9
					4.5	355.1	209.1	104.5
					5	307.2	147.7	76.9
					6	258.7	102.5	61.4
					7	242.4	89.9	56
					8	241.1	85.8	53.3
					9	247.2	85	51.7
					10		85.9	50.8

## Sheet: Fig 9
Input parameters														Output parameters
Qpa	VO2	SF_lung	lung_VQratio	FIO2	Q_ec	SF_ec	oxy_VQratio	FoxyO2	RCF_ec	haemoglobin	temp	DP50	hct	PAO2	PACO2	PAN2	CAO2	CACO2	SAO2	PaO2	PaCO2	PaN2	CaO2	CaCO2	SaO2	PvO2	PvCO2	PvN2	CvO2	CvCO2	SvO2	PpreO2	PpreCO2	PpreN2	CpreO2	CpreCO2	SpreO2	PpostO2	PpostCO2	PpostN2	CpostO2	CpostCO2	SpostO2	PpaO2	PpaCO2	PpaN2	CpaO2	CpaCO2	SpaO2
4	250	0.7	1	1	2	0	1.86	1	0.1	11	37	0	0.33	677.2	35.8	0	17.31	48.19	100	51.8	40	0	13.4	51.09	86.6	25.8	45.6	0	7.15	56.09	46.3	28.7	44.6	0	8.17	55.25	52.9	678.1	34.9	0	17.32	47.74	100	41.4	41.3	0	11.73	52.33	75.9
4.5	250	0.7	1	1	2	0	1.79	1	0.1	11	37	0	0.33	677.2	35.8	0	17.31	48.22	100	50.8	40	0	13.29	51.13	85.9	27.4	45	0	7.74	55.57	50.1	30.3	44	0	8.7	54.77	56.3	678.4	34.6	0	17.32	47.57	100	40.6	41.3	0	11.57	52.37	74.9
5	250	0.7	1	1	2	0	1.72	1	0.1	11	37	0	0.33	677.2	35.8	0	17.31	48.23	100	50.5	40	0	13.26	51.14	85.7	29	44.5	0	8.26	55.14	53.4	31.8	43.6	0	9.16	54.37	59.3	678.5	34.5	0	17.32	47.49	100	40.4	41.3	0	11.52	52.38	74.5
6	250	0.7	1	1	2	0	1.57	1	0.1	11	37	0	0.33	677.2	35.8	0	17.31	48.22	100	51	40	0	13.31	51.12	86.1	31.7	43.7	0	9.15	54.45	59.2	34.4	42.9	0	9.96	53.76	64.5	678.5	34.5	0	17.32	47.49	100	40.8	41.3	0	11.6	52.36	75.1
7	250	0.7	1	1	2	0	1.4	1	0.1	11	37	0	0.33	677.3	35.7	0	17.31	48.18	100	52.2	40	0	13.45	51.08	86.9	34.2	43.2	0	9.87	53.93	63.9	36.8	42.5	0	10.62	53.31	68.7	678.2	34.8	0	17.32	47.65	100	41.7	41.3	0	11.79	52.32	76.3
8	250	0.7	1	1	2	0	1.23	1	0.1	11	37	0	0.33	677.3	35.7	0	17.31	48.13	100	53.7	40	0	13.61	51.02	88	36.4	42.8	0	10.48	53.52	67.9	39.1	42.2	0	11.17	52.96	72.3	677.7	35.3	0	17.32	47.92	100	42.9	41.4	0	12.02	52.26	77.8
9	250	0.7	1	1	2	0	1.07	1	0.1	11	37	0	0.33	677.4	35.6	0	17.31	48.08	100	55.6	40	0	13.78	50.97	89	38.4	42.5	0	11	53.19	71.2	41.1	42	0	11.63	52.7	75.3	677.1	35.9	0	17.31	48.26	100	44.3	41.4	0	12.26	52.2	79.3
10	250	0.7	1	1	2	0	0.9	1	0.1	11	37	0	0.33	677.5	35.5	0	17.32	48.04	100	57.6	40	0	13.95	50.91	90.1	40.3	42.3	0	11.45	52.91	74.1	43.1	41.8	0	12.03	52.49	77.8	676.4	36.6	0	17.31	48.65	99.9	45.7	41.5	0	12.5	52.15	80.9
4	250	0.7	1	1	3	0	1.12	1	0.1	11	37	0	0.33	678.2	34.8	0	17.32	47.66	100	131.6	40	0	15.47	50.48	98.6	32.4	45.9	0	9.22	55.48	59.7	35.2	45.3	0	10.03	54.92	64.9	674.1	38.9	0	17.3	49.86	99.9	73.1	42	0	14.68	51.69	94.6
4.5	250	0.7	1	1	3	0	1.09	1	0.1	11	37	0	0.33	678.1	34.9	0	17.32	47.72	100	95.3	40	0	15.15	50.55	97.2	33.6	45.1	0	9.59	54.99	62.1	36.4	44.6	0	10.37	54.45	67.1	674.6	38.4	0	17.31	49.61	99.9	62.6	41.8	0	14.22	51.76	91.8
5	250	0.7	1	1	3	0	1.05	1	0.1	11	37	0	0.33	678	35	0	17.32	47.77	100	82.1	40	0	14.94	50.6	96.1	34.7	44.6	0	9.94	54.6	64.3	37.5	44.1	0	10.67	54.09	69.1	674.9	38.1	0	17.31	49.45	99.9	58	41.8	0	13.92	51.82	89.9
6	250	0.7	1	1	3	0	0.96	1	0.1	11	37	0	0.33	677.9	35.1	0	17.32	47.83	100	72.9	40	0	14.7	50.67	94.7	36.9	43.8	0	10.54	54.01	68.2	39.6	43.4	0	11.21	53.54	72.6	675.1	37.9	0	17.31	49.31	99.9	54.2	41.7	0	13.58	51.89	87.8
7	250	0.7	1	1	3	0	0.87	1	0.1	11	37	0	0.33	677.9	35.1	0	17.32	47.85	100	70.4	40	0	14.62	50.7	94.2	38.8	43.3	0	11.05	53.56	71.5	41.6	42.9	0	11.67	53.13	75.5	675.1	37.9	0	17.31	49.32	99.9	52.9	41.7	0	13.46	51.92	87
8	250	0.7	1	1	3	0	0.77	1	0.1	11	37	0	0.33	677.9	35.1	0	17.32	47.85	100	70.1	40	0	14.61	50.7	94.2	40.7	42.9	0	11.48	53.2	74.3	43.5	42.5	0	12.07	52.82	78.1	674.9	38.1	0	17.31	49.41	99.9	52.8	41.7	0	13.45	51.92	86.9
9	250	0.7	1	1	3	0	0.68	1	0.1	11	37	0	0.33	677.9	35.1	0	17.32	47.84	100	71.1	40	0	14.64	50.69	94.4	42.5	42.6	0	11.87	52.92	76.8	45.4	42.3	0	12.41	52.58	80.3	674.6	38.4	0	17.31	49.58	99.9	53.3	41.7	0	13.5	51.91	87.2
10	250	0.7	1	1	3	0	0.58	1	0.1	11	37	0	0.33	677.9	35.1	0	17.32	47.83	100	72.8	40	0	14.7	50.68	94.7	44.2	42.3	0	12.2	52.68	78.9	47.2	42.1	0	12.71	52.39	82.2	674.2	38.8	0	17.3	49.79	99.9	54.1	41.7	0	13.58	51.9	87.7
4	250	0.7	1	1	4	0	0.79	1	0.1	11	37	0	0.33	678.3	34.7	0	17.32	47.6	100	518.9	40	0	16.83	50.41	99.9	37.8	46.8	0	10.58	55.41	68.5	40.6	46.4	0	11.25	54.99	72.8	671.4	41.6	0	17.3	51.2	99.9	451.3	42.4	0	16.62	51.62	99.9
4.5	250	0.7	1	1	4	0	0.77	1	0.1	11	37	0	0.33	678.3	34.7	0	17.32	47.6	100	379.1	40	0	16.4	50.41	99.8	38.6	45.8	0	10.85	54.86	70.2	41.5	45.4	0	11.49	54.45	74.3	672.2	40.8	0	17.3	50.81	99.9	258.8	42.4	0	16.01	51.62	99.6
5	250	0.7	1	1	4	0	0.75	1	0.1	11	37	0	0.33	678.3	34.7	0	17.32	47.61	100	281.9	40	0	16.09	50.42	99.7	39.5	45.1	0	11.09	54.42	71.7	42.3	44.7	0	11.71	54.04	75.7	672.7	40.3	0	17.3	50.54	99.9	148.7	42.3	0	15.56	51.63	98.9
6	250	0.7	1	1	4	0	0.69	1	0.1	11	37	0	0.33	678.3	34.7	0	17.32	47.63	100	174	40	0	15.69	50.45	99.2	41.2	44.1	0	11.52	53.78	74.5	44.1	43.8	0	12.1	53.42	78.3	673.3	39.7	0	17.3	50.24	99.9	86	42.1	0	14.99	51.65	96.3
7	250	0.7	1	1	4	0	0.63	1	0.1	11	37	0	0.33	678.2	34.8	0	17.32	47.66	100	131.7	40	0	15.47	50.48	98.6	42.9	43.4	0	11.9	53.34	77	45.8	43.2	0	12.44	53.02	80.5	673.5	39.5	0	17.3	50.13	99.9	73.1	42	0	14.68	51.69	94.6
8	250	0.7	1	1	4	0	0.56	1	0.1	11	37	0	0.33	678.2	34.8	0	17.32	47.68	100	115.4	40	0	15.35	50.5	98.2	44.6	43	0	12.23	53	79.1	47.6	42.8	0	12.74	52.71	82.4	673.5	39.5	0	17.3	50.13	99.9	68.5	41.9	0	14.51	51.71	93.6
9	250	0.7	1	1	4	0	0.5	1	0.1	11	37	0	0.33	678.2	34.8	0	17.32	47.69	100	109	40	0	15.3	50.51	97.9	46.2	42.7	0	12.52	52.74	81	49.4	42.5	0	13	52.48	84	673.4	39.6	0	17.3	50.21	99.9	66.7	41.9	0	14.43	51.72	93.1
10	250	0.7	1	1	4	0	0.43	1	0.1	11	37	0	0.33	678.2	34.8	0	17.32	47.69	100	107.1	40	0	15.28	50.52	97.8	47.8	42.4	0	12.78	52.52	82.7	51.1	42.3	0	13.23	52.3	85.5	673.2	39.8	0	17.3	50.33	99.9	66.2	41.9	0	14.41	51.73	92.9
					SaO2
					Qpa	Qec 2	Qec 3	Qec 4
					4	86.6	98.6	99.9
					4.5	85.9	97.2	99.8
					5	85.7	96.1	99.7
					6	86.1	94.7	99.2
					7	86.9	94.2	98.6
					8	88	94.2	98.2
					9	89	94.4	97.9
					10	90.1	94.7	97.8
					SvO2
					Qpa	Qec 2	Qec 3	Qec 4
					4	46.3	59.7	68.5
					4.5	50.1	62.1	70.2
					5	53.4	64.3	71.7
					6	59.2	68.2	74.5
					7	63.9	71.5	77
					8	67.9	74.3	79.1
					9	71.2	76.8	81
					10	74.1	78.9	82.7
					SpaO2
					Qpa	Qec 2	Qec 3	Qec 4
					4	75.9	94.6	99.9
					4.5	74.9	91.8	99.6
					5	74.5	89.9	98.9
					6	75.1	87.8	96.3
					7	76.3	87	94.6
					8	77.8	86.9	93.6
					9	79.3	87.2	93.1
					10	80.9	87.7	92.9
					SpreO2
					Qpa	Qec 2	Qec 3	Qec 4
					4	52.9	64.9	72.8
					4.5	56.3	67.1	74.3
					5	59.3	69.1	75.7
					6	64.5	72.6	78.3
					7	68.7	75.5	80.5
					8	72.3	78.1	82.4
					9	75.3	80.3	84
					10	77.8	82.2	85.5
					VO2oxy
					Qpa	Qec 2	Qec 3	Qec 4
					4	183	218.1	242
					4.5	172.4	208.2	232.4
					5	163.2	199.2	223.6
					6	147.2	183	208
					7	134	169.2	194.4
					8	123	157.2	182.4
					9	113.6	147	172
					10	105.6	137.7	162.8
[truncated: 2 more columns]
